# Supplementary material
Source: publisher figshare collection journal article supplement (https://springernature.figshare.com/ndownloader/files/22186383)
Supplement: Supplementary file [file 22186383]

# Supplementary Document

## Content

|       |                                                              |    |
|-------|--------------------------------------------------------------|----|
| 1.    | Galaxy on Docker container – DocMethyl .....                 | 2  |
| 1.1   | System Requirement .....                                     | 2  |
| 1.2   | Installation Steps.....                                      | 2  |
| 1.3   | Tools included in Galaxy/DocMethyl Workflows (Fig. S2) ..... | 3  |
| 1.4   | Execute the Workflow by Selection of a Suitable Dataset..... | 6  |
| 1.5   | How to upload files .....                                    | 8  |
| 1.6   | Transfer Outputs to EpiMOLAS_web .....                       | 9  |
| 2.    | EpiMOLAS_web system .....                                    | 10 |
| 2.1   | Browse existing Projects .....                               | 10 |
| 2.2   | Create a Project.....                                        | 11 |
| 2.3   | Generate Gene Sets.....                                      | 15 |
| 2.3.1 | Find Genes According to User’s Interests .....               | 16 |
| 2.3.2 | View a Gene and Find the Neighboring Genes.....              | 17 |
| 2.3.3 | Find Genes by an Arithmetic Calculation .....                | 19 |
| 2.3.4 | Find Genes by KEGG GlobalView .....                          | 20 |
| 2.4   | Tools for Gene List Analysis and Visualization .....         | 20 |
| 2.4.1 | Gene List Enrichment Analysis.....                           | 21 |
| 2.4.2 | Visualization Modules.....                                   | 22 |
| 3.    | Reference .....                                              | 29 |

# 1. Galaxy on Docker container – DocMethyl

## 1.1 System Requirements

DocMethyl is available at <https://hub.docker.com/r/lsbnb/docmethyl/>. We have tested the whole process and provided a demonstration dataset for the Galaxy Docker container on an Ubuntu (16.04 64-bit) server with four-core CPU, 16 GB of RAM, and 400 GB of data storage. The elapsed time on single thread mapping mode for the demonstration dataset (raw data size 5 GB) is about 10 hours and ~50 GB of intermediate files are generated through the workflow. We recommend more data storage for large datasets.

## 1.2 Installation Steps

**Before starting**, please have the Docker engine ready and note that all the descriptions here are the command line instructions on a daemon launched session. Check the following list:

- ✓ Visit <https://docs.docker.com/install/> if you are new to DOCKER. Although different versions of the Docker engine (e.g., Windows or Mac) are available, we suggest users execute DocMethyl on a Linux environment for good efficiency and stability. Besides, a virtual machine on a private or public cloud will be a good choice for the scalability of data size.
- ✓ The server IP is required to access the Galaxy server via the web after the Docker container is launched, unless the server is directly accessed (localhost). Find the IP from the computing resource provider.

**Step 1.** Pull down the Galaxy Docker image from Docker Hub.

```
docker pull lsbnb/docmethyl
```

**Step 2.** Run the Galaxy Docker container and set port numbers for network accessibility and ftp connection.

```
docker run -d -t -i -p 8080:80 -p 8021:21 -p 8022:22 -v
```

```
$('pwd')/galaxy_guest/:/root/galaxy/database/ftp/epimolas@galaxy.org/lsbnb/docmethyl/bin/bash
```

**Step 3.** DocMethyl now is launched and the Galaxy Server will start at localhost (DOCKER), accessible through web browser at port 8080 (Figure S1). ([http://docker\\_IP:8080](http://docker_IP:8080)).

**Step 4.** Login to the Galaxy using the default user account '[epimolas@galaxy.org](mailto:epimolas@galaxy.org)' and password 'epimolas', and run the built-in workflows. For Galaxy administration purposes, login to the server using the account '[admin@galaxy.org](mailto:admin@galaxy.org)' and password 'admin@galaxy'. Please note that any manipulation of the Galaxy settings will not be carried over to a restart session of the Docker container.

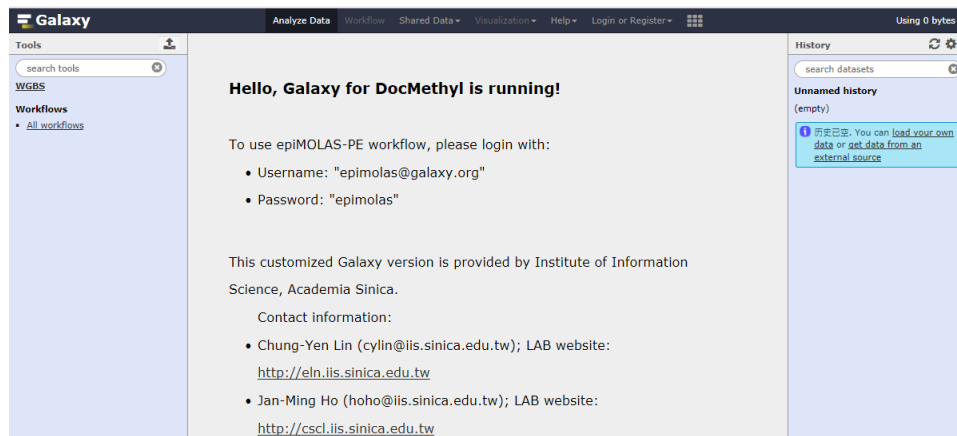

**Figure S1.** A snapshot on the portal page of DocMethyl Galaxy Server ([http://docker\\_IP:8080](http://docker_IP:8080)).

### 1.3 Tools included in Galaxy/DocMethyl Workflows (Figure S2)

**Trim Sequences:** Trim Galore

([https://www.bioinformatics.babraham.ac.uk/projects/trim\\_galore/](https://www.bioinformatics.babraham.ac.uk/projects/trim_galore/)) – A read pair-trimming tool. It removes adapter contamination and low quality bases. Trimmed pairs containing reads less than 20 bp in with length will also be excluded.

**Quality Control (QC) of Raw Reads:** FastQC

(<https://www.bioinformatics.babraham.ac.uk/projects/fastqc/>) – It provides a trimmed read quality report that users can access quickly on screen for the read data, such as GC content, length distribution, and overrepresented sequences.

**Map Reads on Genome and Extract Methylated Sites:** Bismark

(<https://www.bioinformatics.babraham.ac.uk/projects/bismark/>) – A widely used bisulfite sequencing (BS-Seq) aligner that maps bisulfite-treated reads to the reference genome and extracts methylation information for individual cytosines.

**Generate output of submission:** EpiMolas.jar (available at <http://sybiosis.iis.sinica.edu.tw/epimolas/EpiMolas.jar>) – It calculates the methylation landscape on the promoter and gene body region of three sequence contexts (CG, CHG, and CHH). The methylation level is the average of the C methylation ratio from at least five observations (e.g., cytosine) on a particular region (promoter or gene body) with each observation concluded from at least four occurrences (mapping reads) (Equation 1.1 & 1.2) and writes the output, the mtable, for the web service *EpiMOLAS\_web*.

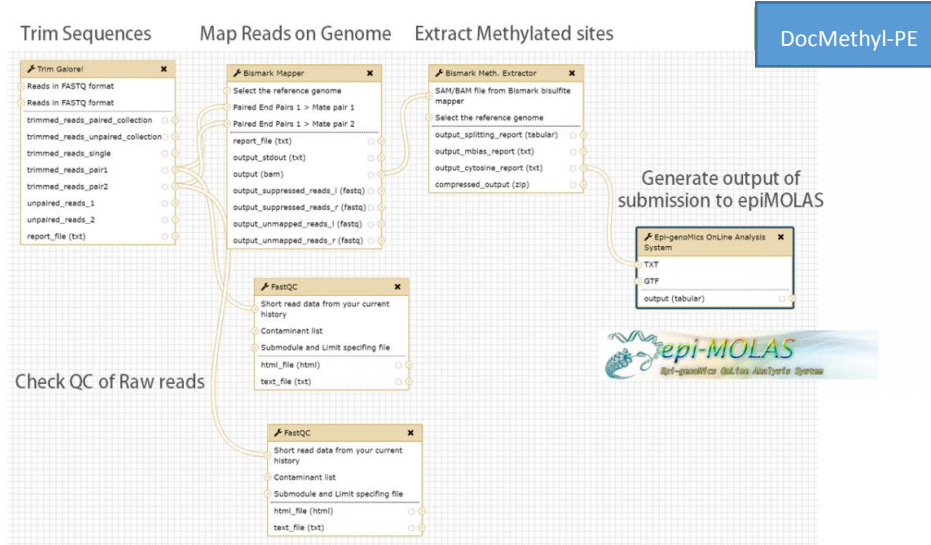

**Figure S2.** The whole workflow of DocMethyl-PE for paired reads.

### About the mtable

5-methylcytosine (5mC) is the best known modified nucleotides in the genome. To catch the essence of the genome methylation status and to meet the efficiency for performing the analysis online, we introduced a straightforward method to measure the methylation landscapes of genes and promoters with regard to the sequence contexts.

The DNA methylation level for an individual cytosine is estimated using Equation (1.1).

the DNA methylation level for individual cytosine  $i$

$$= Ci = \frac{\# read C}{\# read C + read T} \quad (1.1)$$

The methylation landscape of a promoter or a gene body is scored by the average of each observed C in all sequence contexts, as calculated using Equation (1.2):

$$\text{Average DNA methylation level in promoter or gene body} = \frac{\sum_{i \in X} c_i}{\sum_{i \in X} 1} \quad (1.2)$$

X = promoter or gene body

For each qualified observed cytosine, its mapped read depth should reach the minimum threshold of 4 (# of read C+T for Equation 1.1). For promoter region or gene body of each gene, it should have at least five qualified observed cytosines of each sequence context type (Equation 1.2). Thus, the BS-Seq mapping report from the previous step is converted to a summary, **mtable**, of gene methylation landscapes scored by six measurements (*i.e.*, pmt\_CG, pmt\_CHG, pmt\_CHH, gene\_CG, gene\_CHG, gene\_CHH) (Figure S3 & S4). The threshold of read depth, upstream and downstream of promoter regions can be adjusted according to sequencing depth of coverage and putative functional region upstream from the gene.

| 1               | 2        | 3        | 4        | 5        | 6        | 7        |
|-----------------|----------|----------|----------|----------|----------|----------|
| gene_id         | pmt_CG   | gene_CG  | pmt_CHG  | gene_CHG | pmt_CHH  | gene_CHH |
| ENSG00000254870 | 0.000000 | 0.276349 | 0.000000 | 0.007246 | 0.046667 | 0.056741 |
| ENSG00000198563 | NaN      | 0.258258 | 0.000000 | 0.008230 | 0.002304 | 0.063635 |
| ENSG00000234006 | 0.000000 | NaN      | 0.000000 | NaN      | 0.083333 | NaN      |
| ENSG00000213760 | NaN      | 0.000000 | NaN      | 0.000000 | NaN      | 0.046667 |
| ENSG00000204498 | NaN      | NaN      | 0.000000 | 0.000000 | 0.000000 | 0.031111 |
| ENSG00000226979 | NaN      | NaN      | 0.055556 | 0.000000 | 0.050725 | 0.000000 |
| ENSG00000232810 | NaN      | 0.482143 | 0.036706 | 0.010417 | 0.171364 | 0.086735 |
| ENSG00000227507 | NaN      | 0.285714 | 0.125000 | 0.000000 | 0.132344 | 0.035088 |
| ENSG00000204482 | NaN      | 0.937500 | NaN      | 0.005882 | NaN      | 0.035122 |
| ENSG00000204475 | NaN      | NaN      | NaN      | 0.000000 | NaN      | 0.062500 |
| ENSG00000230622 | NaN      | NaN      | 0.164454 | 0.000000 | 0.338504 | 0.000000 |

**Figure S3.** An example of mtable

**Epi-genoMics OnLine Analysis System (Galaxy Version 2017.11.14.1)** Options

**CGmap or txt**  
 TXT of Bismark

**TXT**  
 8: Bismark Meth. Extractor on data 10 and data 3: Genome-wide methylation report.

**GTF**  
 11: Homo\_sapiens.GRCh38.78\_coding.gtf

**Parameter Settings**  
 Full parameter list

**upstream**  
 1000

**downstream**  
 0

**threshold**  
 4

✓ Execute

BS-Seeker usage: java -jar EpiMolas.jar input.CGmap input.gtf [1000 0 4] Bismark usage: java -jar EpiMolas.jar input.bismark\_bt2.CX\_report.txt input.gtf [1000 0 4] Input format of .CGmap and .CX\_report.txt will be determined by file extension. upstream default value 1000 downstream default value 0 threshold default value 4

**Figure S4.** Parameter setting window of EpiMolas.jar in DocMethyl. The default promoter definition is the upstream 1000 bases to 0 away from the transcription start site, and calculation of the methylation ratio is performed only for Cs with a mapping depth greater than 4. Three sequence contexts (CG, CHG, and CHH) in the promoter and gene body regions are reported when at least five Cs are scored.

## 1.4 Execute the Workflow by Selection of a Suitable Dataset

We built two Galaxy workflows to meet the need to process raw data in paired-end format (DocMethyl-PE) or single end (DocMethyl-SE) format respectively. These two workflows can be found in “WGBS” of the menu (left panel) in Galaxy/ DocMethyl. To run the workflow, users should specify read files and the target genome information (the genome sequences in fasta and genome’s annotation in gtf) for the run (Figure S5) in the dialog box and submit the job to Galaxy server. Please make sure that the raw files are in a normal FASTQ format. Compressed read files in format \*.gz or \*.bz2 are acceptable. Once a DocMethyl job starts, the steps of the query will be listed in right panel on the Galaxy web interface (Figure S6).

A galaxy workflow can take files from client desktop; however, this is not applicable in most cases. To use big files in Galaxy and DocMethyl, please refer to the next Section (1.5 How to upload files) for guidance.

**1: Trim Galore! (Galaxy Version 0.4.3.1)**

Is this library paired- or single-end?

Paired-end

Reads in FASTQ format

8: DRR123754\_1.fastq

Reads in FASTQ format

9: DRR123754\_2.fastq

Adapter sequence to be trimmed

**2: Bismark Mapper (Galaxy Version 0.16.3)**

Will you select a reference genome from your history or use a built-in index?

Generate Bismark indexes from Genome (fasta) in your Galaxy history

Select the reference genome

2: Homo\_sapiens.GRCh38.dna.primary\_assembly.fa

**5: Bismark Meth. Extractor (Galaxy Version 0.16.8)**

SAH/BAM file from Bismark bisulfite mapper

Output dataset "output" from step 2

Select the reference genome

2: Homo\_sapiens.GRCh38.dna.primary\_assembly.fa

**6: Epi-Genomics Online Analysis System (Galaxy Version 2017.11.14.1)**

CGmap or txt

TXT

Output dataset "output\_cytosine\_report" from step 5

GTF

1: Homo\_sapiens.GRCh38.TG\_coding.gtf

DocMethyl-PE

Select "Raw Read\_r1"

Select "Raw Read\_r2"

Select "reference Genome"

Select "reference Genome"

Select "GTF"

**Figure S5.** Selecting the files required for a DocMethyl-PE run.

Generate output of submission to epiMOLAS

Extract Methylated sites

Check QC of Raw reads

Map Reads on Genome

Trim Sequences

epiMOLAS-PE

13 shown

(empty)

search datasets

13: Epi-Genomics Online Analysis System on data 1 and data 11

12: Bismark Meth. Extractor on data 2 and data 4: Result archive.

11: Bismark Meth. Extractor on data 2 and data 4: Genome-wide methylation report.

10: Bismark Meth. Extractor on data 2 and data 4: Mbias Report

9: Bismark Meth. Extractor on data 2 and data 4: Solitino Report

8: FastQC on data 2: RawData

7: FastQC on data 2: Webpage

6: FastQC on data 1: RawData

5: FastQC on data 1: Webpage

4: Bismark Mapper on data 2 and data 1: mapped reads

3: Bismark Mapper on data 2 and data 1: mapping report

2: Trim Galore! on data 9 and data 8: trimmed reads pair 2

1: Trim Galore! on data 9 and data 8: trimmed reads pair 1

mtable for submission to epiMOLAS

CG

CHG

CHH

mtable

| gene_id         | pmt_CG | gene_CG  | pmt_CHG | gene_CHG | pmt_CHH | gene_CHH |
|-----------------|--------|----------|---------|----------|---------|----------|
| ENSG00000223972 | NaN    | NaN      | NaN     | NaN      | NaN     | NaN      |
| ENSG00000227232 | NaN    | 0.953683 | NaN     | 0.998377 | NaN     | 0.988220 |
| ENSG00000243485 | NaN    | NaN      | NaN     | NaN      | NaN     | NaN      |
| ENSG00000237613 | NaN    | NaN      | NaN     | NaN      | NaN     | NaN      |
| ENSG00000268020 | NaN    | NaN      | NaN     | NaN      | NaN     | NaN      |
| ENSG00000240361 | NaN    | NaN      | NaN     | NaN      | NaN     | NaN      |
| ENSG00000186992 | NaN    | NaN      | NaN     | NaN      | NaN     | NaN      |
| ENSG00000238009 | NaN    | NaN      | NaN     | 1.000000 | NaN     | 1.000000 |

**Figure S6.** Scheduled processes of a typical run in the Galaxy workflow. Galaxy controls all the processes of a submitted job from trimming the input raw reads to the end output \*.mtable file. The progress of the job, one step after another, is shown with color coding for scheduled (grey), in progress (light yellow), and completed (light green). The content of the output mtable (step 13, Epi-Genomics OnLine Analysis System on data 1 and data 11 in this case), generated via the DocMethyl paired-end (DocMethyl-PE) workflow, includes six measurements of C methylation regarding the location (promoter region and gene body) and sequence types (CG, CHG, CHH).

## 1.5 How to upload files

There are complicated and diverse settings to make the Docker-wrapped Galaxy default FTP server work in various network environments. Therefore, we provided two shortcut solutions to use large files in Galaxy/ DocMethyl without manipulating the system configurations. Considering that most WGBS analyses require a deep read coverage of the genome, which is above the limit of file size in a browser uploading session (around 2 GB), we suggest users can go straight to Solution B, especially B2, to use files uploaded in the same server that hosts the DocMethyl Docker.

**Solution A.** For files with a size less than 2 GB, find “WGBS” in the Galaxy menu panel and use “upload file/ choose local file” to send the file to the server.

**Solution B.** For files > 2 GB (most cases), you can choose one of the two approaches below:

- B1. For data deposited in **an open-access ftp site**, find “WGBS” in the Galaxy menu panel, choose “upload file -> paste and fetch data” and provide the file URL(s) to get the file(s).

Example: [ftp://ftp.ddbj.nig.ac.jp/ddbj\\_database/dra/fastq/SRA068/SRA068307/SRX247357/SRR776587\\_1.fastq.bz2](ftp://ftp.ddbj.nig.ac.jp/ddbj_database/dra/fastq/SRA068/SRA068307/SRX247357/SRR776587_1.fastq.bz2)

- B2. Connect to the Linux server that hosts the DocMethyl Docker container via a FTP software tool. Create a file directory “galaxy\_guest” in the same folder the Docker image being deployed. For example, if “docker pull” command is executed in the path “\$~/home/user/test\_docker/”, the correct path of the FTP folder will be “\$~/home/user/test\_docker/galaxy\_user/”. This folder will be mounted as the deployed DocMethyl/ Galaxy FTP default file folder. Now, from the “upload file -> choose FTP file” in “WGBS” on the Galaxy menu (the left panel of the browser interface), you can find the files that were uploaded into this /galaxy\_user/ folder (Figure S7).

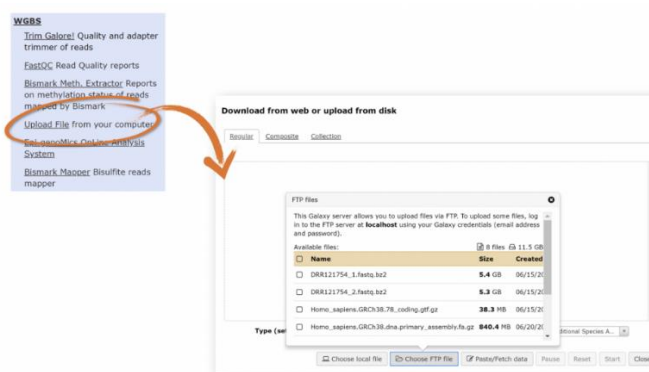

**Figure S7.** Find files in a local directory that is mounted as a FTP directory.



## 1.6 Transfer Outputs to EpiMOLAS\_web

As shown in Figure S6, a DocMethyl job triggers thirteen continuous steps and produces the output mtable in the last step. One mtable file will be derived from one submitted BS-Seq/ WGBS read dataset. For example, if an experimental design includes two conditions with three replicates each, there will be six mtables in total derived from six DocMethyl jobs of six WGBS datasets. Users can download the mtable of each job from Galaxy right panel; these files are compatible with the EpiMOLAS web application, EpiMOLAS\_web. For users who run the DocMethyl workflow on a genome other than human, mouse, or Arabidopsis, the bisulfite mapping reports from Bismark are available in the previous step (*i.e.*, step 12 in Figure S6). Please note that these files may be large and will take a longer time to download.

## 2. EpiMOLAS\_web system

EpiMOLAS\_web (<http://symbiosis.iis.sinica.edu.tw/epimolas>) is a web service that links the summary of WGBS data (*mtable*) with a rich annotation databases for human, mouse, and Arabidopsis (Figure S8). The data uploading process is a wizard guided method that leads users to create a private or open-accessible website in EpiMOLAS\_web. One important issue is the compatibility of user's data. The format *mtable* is described in Section 1.3. For users who does not use the Docker container DocMethyl (<https://hub.docker.com/r/lisbnb/docmethyl/>), please check the usage of “EpiMolas.jar” to generate a *mtable* through BS-Seq mapper BS-Seeker2/*bs\_seeker2-call\_methylation.py* or Bismark/*bismark\_methylation\_extractor* programs (<http://symbiosis.iis.sinica.edu.tw/epimolas/mapping.html>), and make sure that the reference genome and gtf file are compatible with EpiMOLAS\_web (<http://symbiosis.iis.sinica.edu.tw/epimolas/gtf.html>). A web project built for non-registered users is held in the system for one month. Long term website maintenance is also available upon request.

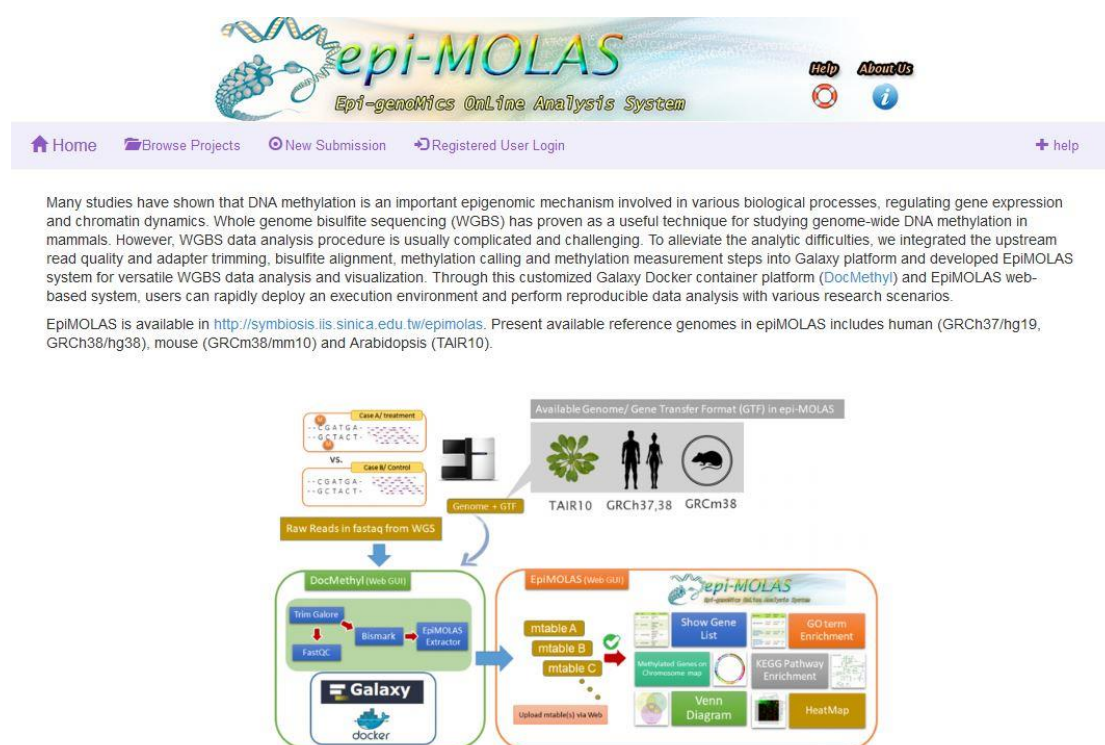

Figure S8. The web portal of EpiMOLAS\_web.

### 2.1 Browse existing Projects

Before users' data becomes ready, there are Demo Sites (human, mouse,

and Arabidopsis) that allow users to try the analysis, or users can find other established projects in the system if the project owners (data submitters) set the website release status as "open to public" (Figure S9 & S10).

**Figure S9.** The web portal for browsing projects.

| Project Description                                                                                                           | WebSite             | Status  | Contact Person         | Created Time        |
|-------------------------------------------------------------------------------------------------------------------------------|---------------------|---------|------------------------|---------------------|
|                                                                                                                               | test_grch38         | private | sophia.emily@gmail.com | 2018-07-04 18:15:43 |
| 2015 Cell gse63818 dataset                                                                                                    | gse63818dataset     | open    | daniel0523@gmail.com   | 2018-01-29 17:15:25 |
| 2015 Cell gse63818 dataset                                                                                                    | gse63818data        | open    | daniel0523@gmail.com   | 2018-01-29 13:22:31 |
| PGC dataset gse63818                                                                                                          | gse63818            | open    | daniel0523@gmail.com   | 2018-01-26 17:54:48 |
| Methylpurify 12 lung tissue data set                                                                                          | methylpurifydata    | open    | daniel0523@gmail.com   | 2017-11-21 07:26:28 |
| Lung Tissue Dataset MethylPurify: tumor purity deconvolution and differential methylation detection from tumor DNA methylomes | methylpurifydataset | open    | daniel0523@gmail.com   | 2017-11-14 15:43:05 |
|                                                                                                                               | grch38              | open    | daniel0523@gmail.com   | 2017-03-23 17:32:37 |
| test human dataset                                                                                                            | testhuman           | private | daniel0523@gmail.com   | 2016-01-07 12:16:48 |
| tair10                                                                                                                        | tair10              | open    | daniel0523@gmail.com   | 2015-12-20 16:05:41 |
| grcm38                                                                                                                        | grcm38              | open    | daniel0523@gmail.com   | 2015-12-20 16:03:44 |

**Figure S10.** List of all projects stored in EpiMOLAS\_web with their status and contact information.

## 2.2 Create a Project

Mtables generated by the DocMethyl workflow in the Galaxy/DocMethyl Docker or by EpiMolas.jar alone can be submitted to the EpiMOLAS\_web server to create a project

which is a website that joins the data to the annotation database and the analysis toolkit. The six measurements are summarized by the combination of three sequence contexts (CG, CHG, and CHH) and two gene regions (promoter and gene body) (Figure S6). The general principle is depicted in Figure S11.

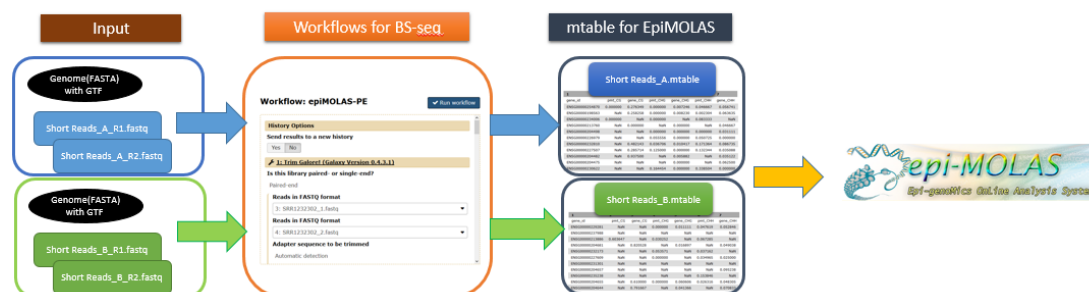

**Figure S11.** Illustration of throughput analysis from raw data to creating a project.

The option "**New Submission**" can be found on the navigator bar. Users should choose the compatible genome and load files first. Clicking on the "demo" icon beside the genome items will start a short tutorial about the data uploading process (Figure S12). Alternatively, users can try the "Load example data" button beside the dataset uploading box and use the demo dataset to run through the data deployment process to the resulting website. Gene IDs in each uploaded mtable will be matched to the EpiMOLAS\_web database and return the matching rate upon the file uploading process; the sample label should be assigned here. Click on "submit" and the server will generate a brief summary of this submission (Figure S13). For a registered user, we require the access authority in the next step, then users will be lead to subsequent steps to fill in all the required information, *e.g.*, registered user's email, a password (for validating this registered user), the website access policy (*i.e.*, open to public, private use, or restricted to people with a secret word shared by the project or website creator). For non-registered users, less information is required, however, there is also no detailed website policy options available; therefore, the created website will be held for one month only. When all the required information has been provided and submitted, system will start processing the data linkage and construct a web portal for this submission (Figure S14 & S15).

[Home](#)
[Browse Projects](#)
[New Submission](#)
[Registered User Login](#)
[help](#)

Please check the **Important issues** in the help menu to know about GTF, methylation landscape and BS Seq mapping process if necessary.



demo

Arabidopsis, TAIR10



demo

Human, GRCh37



demo

Human, GRCh38



demo

Mouse, GRCm38

Showing 1 to 3 of 3 entries

Search:

| Sample Label | File Name | Uploaded IDs | Mapped IDs           | mapped in grch37 geneid |                  |
|--------------|-----------|--------------|----------------------|-------------------------|------------------|
| day1         | day1      | 53936        | 100.0% (53936/53936) | 84.0% (53936/63677)     | edit name delete |
| day2         | day2      | 53936        | 100.0% (53936/53936) | 84.0% (53936/63677)     | edit name delete |
| day3         | day3      | 53936        | 100.0% (53936/53936) | 84.0% (53936/63677)     | edit name delete |

Showing 1 to 3 of 3 entries

Previous Next

Choose File

No file chosen

Upload file

Load example data

+

-

Submit

Clear

**Figure S12.** Creating a project.

The first five data rows in the expression data file:

| gene_id   | pmt_CG   | gene_CG  | pmt_CHG  | gene_CHG | pmt_CHH  | gene_CHH | operation           |
|-----------|----------|----------|----------|----------|----------|----------|---------------------|
| AT1G01010 | 0.005000 | 0.058446 | 0.003750 | 0.028333 | 0.004739 | 0.024961 | Modify the Data IDs |
| AT1G01020 | 0.012353 | 0.092468 | 0.013182 | 0.015667 | 0.013614 | 0.019084 |                     |
| AT1G01030 | 0.013000 | 0.021660 | 0.012927 | 0.017412 | 0.014826 | 0.017534 |                     |
| AT1G01040 | 0.017000 | 0.579103 | 0.018056 | 0.018186 | 0.007202 | 0.019754 |                     |
| AT1G01046 | 0.716700 | 0.487500 | 0.012407 | 0.005000 | 0.015059 | 0.008923 |                     |

Select library:

Present Selected:

Dataset

operation

Modify Delete

Selecting Dataset

☐pmt\_CG
☐gene\_CG
☐pmt\_CHG
☐gene\_CHG

☐pmt\_CHH
☐gene\_CHH

Update

Reset

Create New Project

(Provide a static link for submission revised and shared for 12 months) function is for internal use only.

Just a try without Project creation

(Just a dynamic link available for one month)

Clear All

**Figure S13.** Summary of the uploaded mtables in the submission.



[Help](#)
[About Us](#)

[Home](#)
[Browse Projects](#)
[New Submission](#)
[Registered User Login](#)
+ help

i

You are going to create a temporary analysis project in EpiMOLAS.

Please leave your contact info here so that we can send a mail to inform you the project URL upon the data deployment complete.

All info here are for log, informing the project accession path, and EpiMOLAS usage stat only. No further purpose will be imposed.

### Project Creator

• Your Name : (optional)

• e-mail: (optional)

(type again)

• Affiliation: (optional)

• Country: Select a country ...



●

This project is a study on

grch37 reference genome (gene #53936,dataset#6)

• Project Brief: (optional, limit to 250 words)

### Project Info

**Project Name**  (limit to 50 words)

Brief on this Project ?:

Upload an website logo (image file in jpg,gif,or png format)

Choose File

No file chosen

?

Name of Sub-directory: http://sybiosis.iis.sinica.edu.tw/epimolas/  ?

Contact E-mail as Account:  ?

Password:  ?

Open to Public: ☒ **Yes**

☐ **No** ☐ share this project data to my friends with this secret word:  ?

**Figure S14.** The web portal allows users to provide information about the project and set the project as public or private.

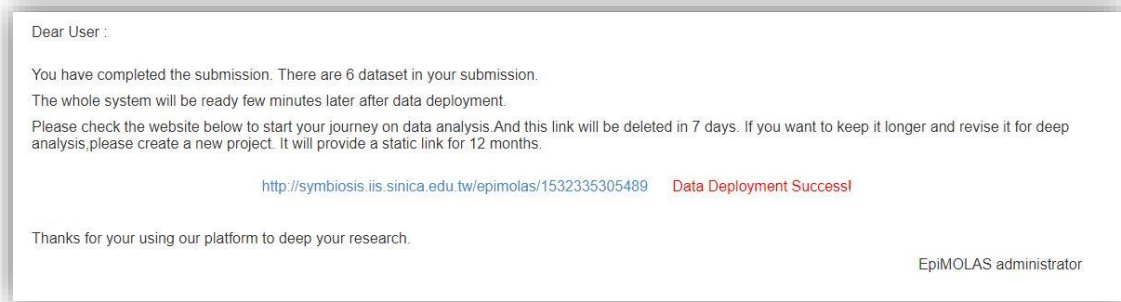

**Figure S15.** Message from the administrator to notify the completion of a job submission.

For more details about new project creation, please visit our online documentation.

[http://symbiosis.iis.sinica.edu.tw/epimolas/build\\_project.html](http://symbiosis.iis.sinica.edu.tw/epimolas/build_project.html)

Once the project is created successfully, please check the online tutorials on how to access and investigate the data.

[http://symbiosis.iis.sinica.edu.tw/epimolas/access\\_project.html](http://symbiosis.iis.sinica.edu.tw/epimolas/access_project.html)

## 2.3 Generate Gene Sets

A general strategy to explore biological meaning in high-throughput, genome-wide scale experiments is to find a set of genes that is associated with a particular function. The gene set may be derived from a quantitative assay based on a comparison, for example, to find genes that meet the criteria of “having difference between two experiment groups”, such as a cut-off ratio or a subtraction result. Other ways to define gene sets are canonically defined sets of genes such as gene ontology (GO) terms, Kyoto Encyclopedia of Genes and Genomes (KEGG) pathways, and Boolean operations on an interesting collection from users’ domain knowledge. In this case, the gene lists are often cross-referred to quantitative assay-derived gene sets to highlight the genes with dynamics among the experimental design. Here we design various ways to meet these needs. Besides the arithmetic calculation on values (the six methylation measures), users can extract gene sets according to their interests, such as a text or keyword search on annotation tables, or a KEGG GlobalView query, or finding genes by uploading a list. (Figure S16).



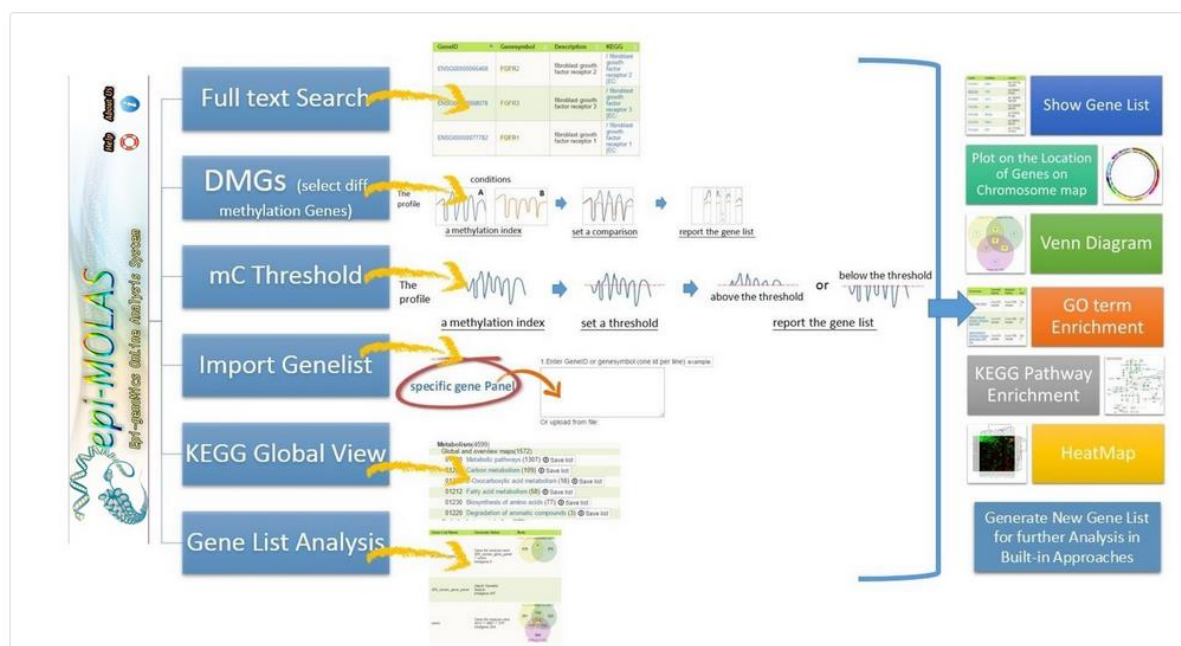

**Figure S16.** The schema of the EpiMOLAS\_web analysis modules. It provides ways for users to decipher their data more intuitively and generate a gene list for specific spatiotemporal scenarios. These methods are described in this supplementary document and at the website in more detail.

### 2.3.1 Find Genes According to User's Interests

In the module “Full-Text Search”, users can search the annotation database by Gene ID, gene symbol, keywords in the gene description, and by KEGG pathway name. In the modules “KEGG GlobalView”, users can browse KEGG pathway lists and find genes on the interactive map. The function “save as a list” in the pathway list view is available to grasp the genes in a KEGG map as a gene list for other analyses (Figure S17). In the module “Import Genelist”, users can copy and paste a list into the query form or can upload a plain text file containing a gene list in Ensembl gene IDs or official gene symbols.





Home Full-text search DMGs mC Threshold Import Genelist KEGG GlobalView Gene List Analysis

### Full-text search

Enter your keywords:

Search : ☒ Gene ID ☒ Genesymbol ☒ description ☐ KEGG

Showing 1 to 10 of 17 entries (filtered from 64,253 total entries) Show  entries

Search:

| GeneID          | Genesymbol | Description                              | KEGG                                       |
|-----------------|------------|------------------------------------------|--------------------------------------------|
| ENSG00000066468 | FGFR2      | fibroblast growth factor receptor 2      | / fibroblast growth factor receptor 2 [EC: |
| ENSG00000068078 | FGFR3      | fibroblast growth factor receptor 3      | / fibroblast growth factor receptor 3 [EC: |
| ENSG00000077782 | FGFR1      | fibroblast growth factor receptor 1      | / fibroblast growth factor receptor 1 [EC: |
| ENSG00000111790 | FGFR1OP2   | FGFR1 oncogene partner 2                 |                                            |
| ENSG00000127418 | FGFRL1     | fibroblast growth factor receptor-like 1 |                                            |
| ENSG00000133393 | FOPNL      | FGFR1OP N-terminal like                  | / lisH domain-containing protein FOPNL     |
| ENSG00000160867 | FGFR4      | fibroblast growth factor receptor 4      | / fibroblast growth factor receptor 4 [EC: |
| ENSG00000213066 | FGFR1OP    | FGFR1 oncogene partner                   | / FGFR1 oncogene partner                   |
| ENSG00000223971 | FGFR3P     |                                          |                                            |
| ENSG00000224131 | FGFR3P     |                                          |                                            |

Showing 1 to 10 of 17 entries (filtered from 64,253 total entries)

**Figure S17.** An example of a full text search on the annotation database.

## 2.3.2 View a Gene and Find the Neighboring Genes

Figure S18 shows the gene information provided in EpiMOLAS\_web, including the basic description in the database, and the six methylation measures of this gene among all the experiment conditions or replicates. A Genome browser view for the location and gene structure, and an interactive chart to list the gene’s neighbors in a given range are also provided.

A

ENSG00000077782: FGFR1

Gene: FGFR1

Gene Central View

|                                              |                     |
|----------------------------------------------|---------------------|
| FGFR1<br>fibroblast growth factor receptor 1 |                     |
| Ensembl ID                                   | Gene_Biotype        |
| ENSG00000077782                              | protein_coding      |
| Synonym/ prev Symbol                         | chromosome location |
| chr8: 38,268,656-38,326,352 reverse strand.  |                     |

The methylation level of FGFR1 in all libraries

Layout 1: by sequence type

Layout 2: by location

B

Layout 1: by sequence type

Layout 2: by location

## Layout 1

Main categories in methylC sequence contexts (CG/CHG/CHH)

| Methylation Level                   |        |          |          |          |          |          |
|-------------------------------------|--------|----------|----------|----------|----------|----------|
| ENSG00000077782                     | pmt_CG | gene_CG  | pmt_CHG  | gene_CHG | pmt_CHH  | gene_CHH |
| PGC_10W_embryo1_M_HiSeq2000         | NA     | 0.070668 | NA       | 0.020021 | 0.025    | 0.016359 |
| PGC_11W_embryo1_F_HiSeq2500         | NA     | 0.081937 | 0.042857 | 0.016529 | 0.032483 | 0.01041  |
| PGC_11W_embryo1_M_rep1_HiSeq2000    | NA     | 0.040711 | NA       | 0.028143 | NA       | 0.017666 |
| PGC_11W_embryo1_M_rep2_HiSeq2000    | NA     | 0.069613 | NA       | 0.022122 | NA       | 0.012733 |
| PGC_17W_embryo1_F_HiSeq2500         | NA     | 0.057607 | 0.046429 | 0.018839 | 0.008471 | 0.011115 |
| PGC_19W_embryo2_M_HiSeq2500         | NA     | 0.006452 | NA       | 0.017344 | NA       | 0.008884 |
| Soma_11W_embryo1_M_HiSeq2500_deeper | NA     | 0.768997 | NA       | 0.029733 | NA       | 0.031864 |

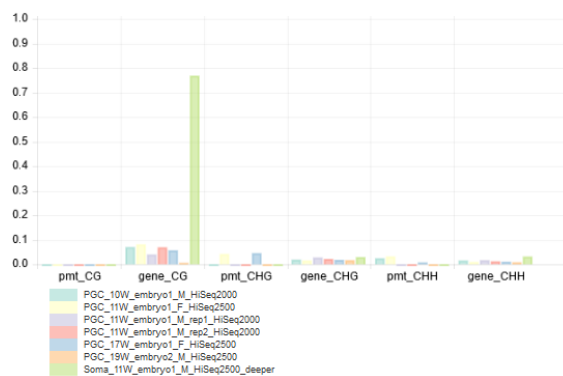

Layout 1: by sequence type

Layout 2: by location

## Layout 2

Main categories in methylC location (promoter / gene)

| Methylation Level                   |        |          |          |          |          |          |
|-------------------------------------|--------|----------|----------|----------|----------|----------|
| ENSG00000077782                     | pmt_CG | pmt_CHG  | pmt_CHH  | gene_CG  | gene_CHG | gene_CHH |
| PGC_10W_embryo1_M_HiSeq2000         | NA     | NA       | 0.025    | 0.070668 | 0.020021 | 0.016359 |
| PGC_11W_embryo1_F_HiSeq2500         | NA     | 0.042857 | 0.032483 | 0.081937 | 0.016529 | 0.01041  |
| PGC_11W_embryo1_M_rep1_HiSeq2000    | NA     | NA       | NA       | 0.040711 | 0.028143 | 0.017666 |
| PGC_11W_embryo1_M_rep2_HiSeq2000    | NA     | NA       | NA       | 0.069613 | 0.022122 | 0.012733 |
| PGC_17W_embryo1_F_HiSeq2500         | NA     | 0.046429 | 0.008471 | 0.057607 | 0.018839 | 0.011115 |
| PGC_19W_embryo2_M_HiSeq2500         | NA     | NA       | NA       | 0.006452 | 0.017344 | 0.008884 |
| Soma_11W_embryo1_M_HiSeq2500_deeper | NA     | NA       | NA       | 0.768997 | 0.029733 | 0.031864 |

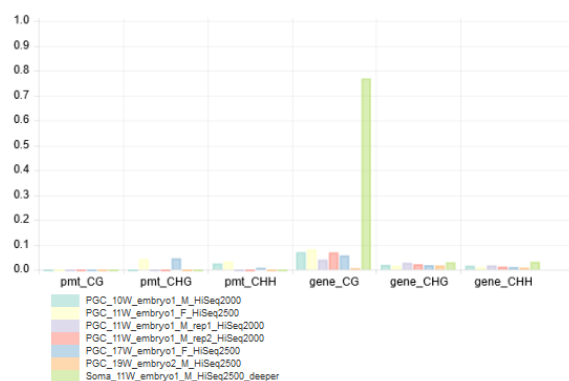

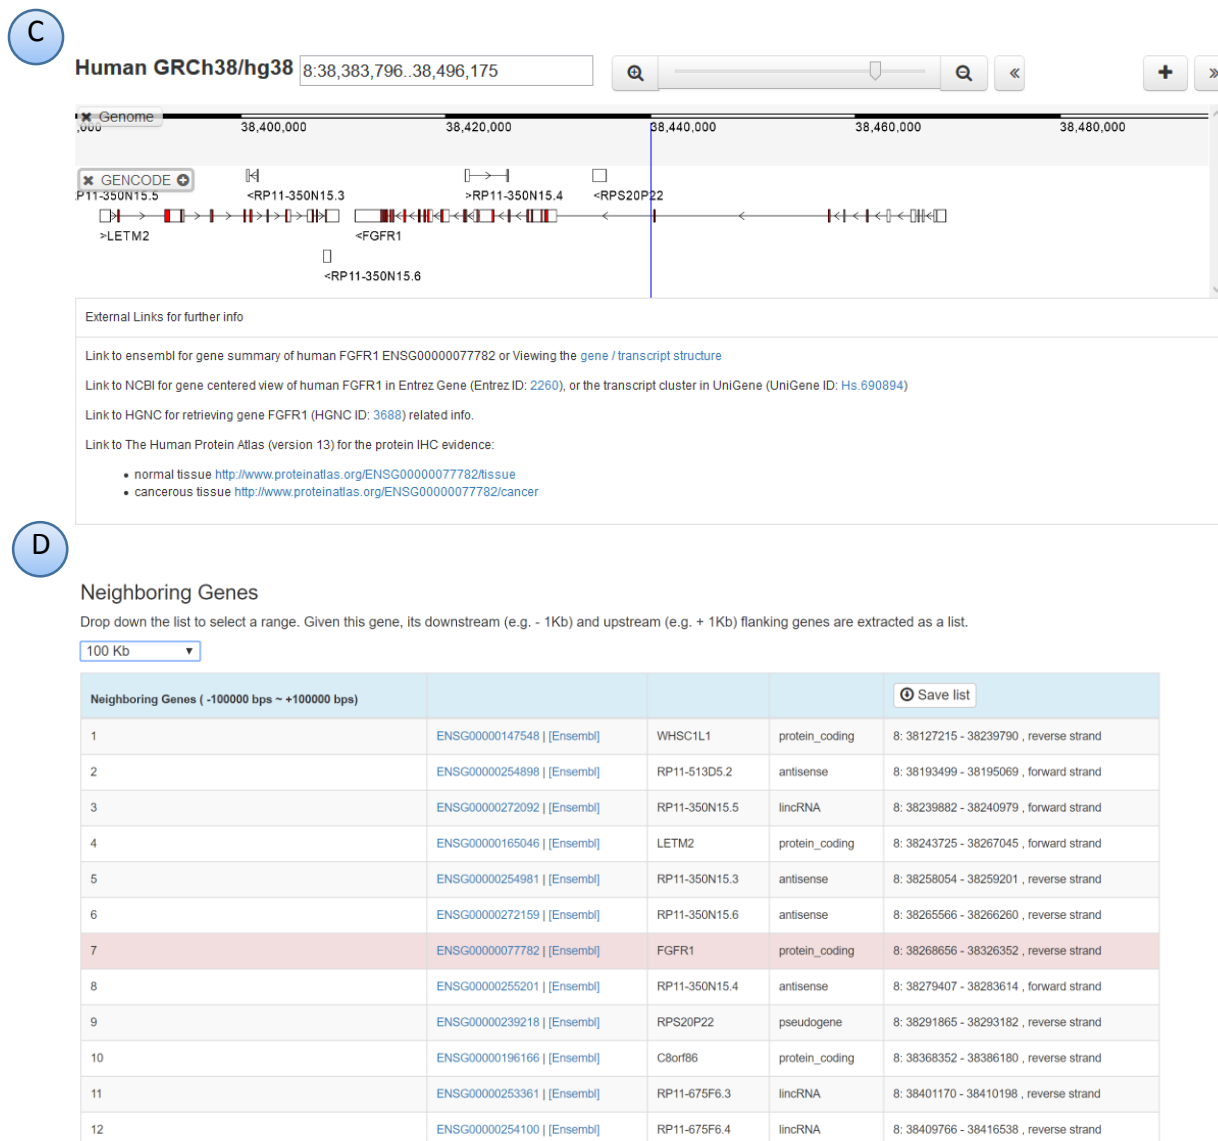

**Figure S18.** (A) The basic annotation with the chromosome location. (B) The methylation levels for the promoter and gene body with three types of methylation, CG, CHG, and CHH. (C) The genome browser to navigate the gene on the genome. (D) The neighboring genes around a specific gene (ENSG00000077782 in this case is marked in red).

### 2.3.3 Find Genes by an Arithmetic Calculation

Module **DMGs** (differentially methylated genes) is a pairwise comparison workflow between two data pools, where single or multiple datasets can be assigned to one data pool (e.g., an experimental condition). Through customized and flexible parameter settings, genes that fulfill the criteria are selected. Module **mC Threshold** is used to select genes above or below a cutoff in at least one dataset, or among all datasets. These two modules provide different ways to extract the methylation signatures of the six combinatorial sequence contexts and regions.

### 2.3.4 Find Genes by KEGG GlobalView

KEGG Pathway maps provide users with a knowledge-based view of biological processes. Users can find a KEGG map by a pathway name search or by browsing. In a KEGG pathway map, each KEGG component box highlighted in green means that the content of this KEGG component matches the user's uploading data. Clicking on the component will lead to a summary page of the methylation landscapes of the genes (gene body and promoter for CG, CHG, CHH) for all mapped genes in this component (Figure S19). In addition, users can store gene sets in specific KEGG maps and perform versatile gene set analyses as described previously (See **2.3.1 Find Genes According to User's Interests**).

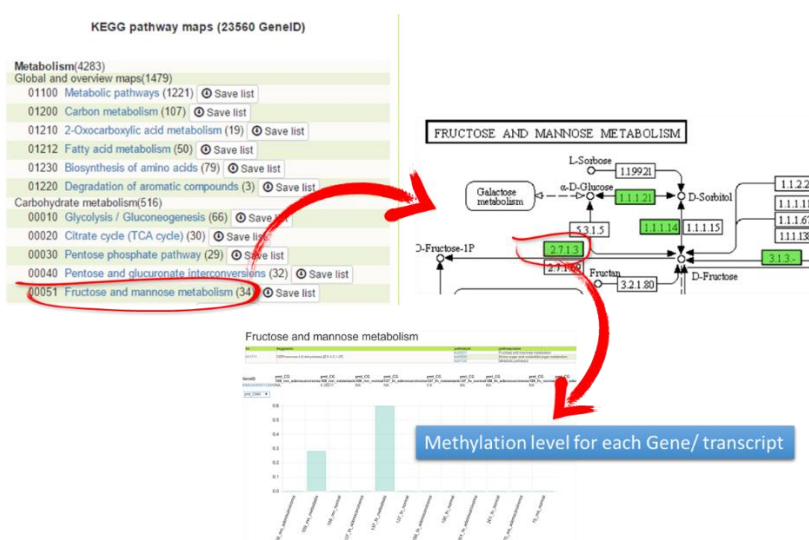

**Figure S19.** Finding genes by a specific pathway view. A partial list shown in the module “**KEGG GlobalView**”. Click on the pathway link, such as “00051 Fructose and mannose metabolism” in this case, and system will return the corresponding KEGG map. Users can examine the methylation landscapes of genes for each map component.

## 2.4 Tools for Gene list Analysis and Visualization

Gene list items are derived from all kinds of sources, such as an arithmetic result on a particular feature between two groups (*i.e.*, calculated in the module “DMG” interface), or a keyword present in the annotation table (*i.e.*, full-text search). A gene list that provides clear biological insight will be good evidence for the hypothesis of the original experimental design. In EpiMOLAS\_web, we built gene set tools for enrichment analysis and visualization, such as KEGG pathway enrichment, GO term enrichment, circos plot, heatmap with hierarchical clustering, and protein-protein interaction

networks, for a macro-level view. A gene list from any data analysis module can be displayed and saved for later reuse. One analysis function, *Venn diagram* is only available for the module “**Gene List Analysis**” (Figure S20).

### Import Genelist

1. Enter GeneID or genesymbol: (one id per line)

Or upload from file:

No file chosen

[download example](#)

  

2. Select Analytic Approach:

- ☒ Show Gene List (Max. 65535 transcriptid)
- ☐ Plot on the location of genes on chromosome map
- ☐ Calculate GO term enrichment    default p value cutoff
- ☐ Calculate KEGG pathway enrichment
- ☐ Draw heatmap with 2D clustering (Max. 3000 transcriptid)
- ☐ Map on Protein Network (Max 600 transcripts)

**Figure S20.** The gene set analysis modules. Several approaches, such as GO terms and KEGG pathway enrichment analysis, hierarchical clustering heatmap, and protein interaction network analysis, are provided for gene list analysis.

## 2.4.1 Gene List Enrichment Analysis

### Gene Ontology terms and KEGG pathway enrichment analysis

In general, a set of genes of interest is usually involved in some activities for responding to perturbations of particular biological processes. Users can study which biological processes, molecular functions, cellular components, or KEGG pathways are associated with a particular disease or a specific phenotype through GO terms and KEGG pathway enrichment analysis. For the statistical significance of enrichment score, we adopt the hypergeometric probability distribution to calculate the p-value. Figure S21 and S22 are examples for a given gene list run for GO and KEGG enrichment. The “save list” in the right end column will extract a sub-list of genes that were submitted for GO enrichment and are associated with the GO functional categories.

## Biological Process

Showing 1 to 10 of 213 entries **Show** 10 **entries**

Search:  **CSV**

| Gene term name                                                                                      | Transcriptid frequency   | Background frequency         | P-value | Transcriptid annotated to the term              |
|-----------------------------------------------------------------------------------------------------|--------------------------|------------------------------|---------|-------------------------------------------------|
| <a href="#">insulin-like growth factor receptor signaling pathway</a>                               | 3 out of 21 transcriptid | 35 out of 16078 transcriptid | 1.22e-5 | ENSG00000106070<br>ENSG00000140443<br>Save list |
| <a href="#">genetic imprinting</a>                                                                  | 2 out of 21 transcriptid | 28 out of 16078 transcriptid | 0.00060 | ENSG00000162595<br>ENSG00000198300<br>Save list |
| <a href="#">phosphatidylinositol catabolic process</a>                                              | 1 out of 21 transcriptid | 1 out of 16078 transcriptid  | 0.00131 | ENSG00000198825<br>Save list                    |
| <a href="#">inactivation of MAPKK activity</a>                                                      | 1 out of 21 transcriptid | 1 out of 16078 transcriptid  | 0.00131 | ENSG00000140443<br>Save list                    |
| <a href="#">positive regulation of mitosis</a>                                                      | 2 out of 21 transcriptid | 42 out of 16078 transcriptid | 0.00136 | ENSG00000139687<br>ENSG00000140443<br>Save list |
| <a href="#">positive regulation of nuclear division</a>                                             | 2 out of 21 transcriptid | 55 out of 16078 transcriptid | 0.00231 | ENSG00000139687<br>ENSG00000140443<br>Save list |
| <a href="#">negative regulation of transcription during mitosis</a>                                 | 1 out of 21 transcriptid | 2 out of 16078 transcriptid  | 0.00261 | ENSG00000139687<br>Save list                    |
| <a href="#">negative regulation of transcription from RNA polymerase II promoter during mitosis</a> | 1 out of 21 transcriptid | 2 out of 16078 transcriptid  | 0.00261 | ENSG00000139687<br>Save list                    |
| <a href="#">sister chromatid biorientation</a>                                                      | 1 out of 21 transcriptid | 2 out of 16078 transcriptid  | 0.00261 | ENSG00000139687<br>Save list                    |
| <a href="#">skeletal muscle cell differentiation</a>                                                | 2 out of 21 transcriptid | 62 out of 16078 transcriptid | 0.00293 | ENSG00000118495<br>ENSG00000139687<br>Save list |

Showing 1 to 10 of 213 entries

Previous Next

**Figure S21.** Enriched GO terms in biological process.

| Pathway name                                     | Numbers frequency    | Background frequency     | P-value | transcriptid associated to the term          |
|--------------------------------------------------|----------------------|--------------------------|---------|----------------------------------------------|
| <a href="#">Protein digestion and absorption</a> | 5 out of 59 knumbers | 54 out of 8656 knumbers  | 3.03e-5 | ENSG00000169436 ENSG00000053918<br>Save list |
| <a href="#">Endocytosis</a>                      | 6 out of 59 knumbers | 146 out of 8656 knumbers | 0.00045 | ENSG00000157985 ENSG00000186111<br>Save list |
| <a href="#">Nicotine addiction</a>               | 3 out of 59 knumbers | 26 out of 8656 knumbers  | 0.00070 | ENSG00000182256 ENSG00000148408<br>Save list |
| <a href="#">Morphine addiction</a>               | 4 out of 59 knumbers | 60 out of 8656 knumbers  | 0.00071 | ENSG00000182256 ENSG00000112541<br>Save list |
| <a href="#">Insulin signaling pathway</a>        | 4 out of 59 knumbers | 85 out of 8656 knumbers  | 0.00261 | ENSG00000188191 ENSG00000067606<br>Save list |
| <a href="#">Focal adhesion</a>                   | 5 out of 59 knumbers | 151 out of 8656 knumbers | 0.00355 | ENSG00000186111 ENSG00000134871<br>Save list |
| <a href="#">Wnt signaling pathway</a>            | 4 out of 59 knumbers | 96 out of 8656 knumbers  | 0.00406 | ENSG00000145506 ENSG00000162337<br>Save list |
| <a href="#">PI3K-Akt signaling pathway</a>       | 6 out of 59 knumbers | 242 out of 8656 knumbers | 0.00586 | ENSG00000134871 ENSG00000130635<br>Save list |
| <a href="#">ECM-receptor interaction</a>         | 3 out of 59 knumbers | 64 out of 8656 knumbers  | 0.00934 | ENSG00000134871 ENSG00000130635<br>Save list |
| <a href="#">Notch signaling pathway</a>          | 2 out of 59 knumbers | 25 out of 8656 knumbers  | 0.01239 | ENSG00000159692 ENSG00000005339<br>Save list |

Showing 1 to 10 of 117 entries

Previous Next

**Figure S22.** Enriched KEGG pathways for the given gene sets.

## 2.4.2 Visualization Modules

### Protein-Protein Interaction Network analysis

Here, we implemented a protein-protein interaction network (PPIN) viewer for integrating, visualizing, and analyzing gene list members in the protein network context in the system (Figure S23). This java plugin is based on Cytoscape.js [1], which supports network analysis and visualization. We use the BioGRID protein interaction data (version 3.4.159) to build the network topology. As a protein network graph, each node represents a protein, and each edge represents a known interaction between two nodes. We provide various network layout options and use the node size as a key

that visualizes the relative importance of each node with regard to the selected network topology measure. For example, degree centrality is a naive measure of the interacting neighbors of a node. Closeness and betweenness centrality are two of the most widely used global centrality measures. Furthermore, the option “Shortest path level” [2] on the function panel “**Layout**” allows the recruitment of extra neighboring nodes to build connections between any two nodes in the original input gene list.

The three major parts on the function panel of this PPIN viewer are:

- **Search**: Users can locate genes on the network subgraph by the gene symbol in the exact search. To find more than one protein in one query, users can separate the query with multiple gene symbols by commas.
- **Layout**: The protein network layout can be displayed in *Grid*, *Random*, *CoSE*, *Concentric*, *Breadthfirst*, *Arbor*, *Cola*, *Dagre*, and *Spread* manners. The network topology measures include degreeCentrality, degreeCentralityNormalized, closenessCentrality, closenessCentralityNormalized, and betweennessCentrality. In addition, the option “shortest path level” will expand the subnetwork to include connected paths that require only one or two extra stepping nodes (neighboring proteins) between any two nodes in the original input list. Recruited neighboring genes and edges for this expansion are discriminated in red.
- **Export**: The selected gene list or network can be exported as a Cytoscape JSON file, a text file of binary protein interactions, or an image in PNG or JPG format.

**Table S1.** The numbers of protein ID and non-redundant binary interactions for species.

|             | Protein IDs | Protein-Protein Interactions |
|-------------|-------------|------------------------------|
| Arabidopsis | 10,216      | 48,374                       |
| Mouse       | 7,026       | 19,308                       |
| Human       | 17,515      | 320,510                      |



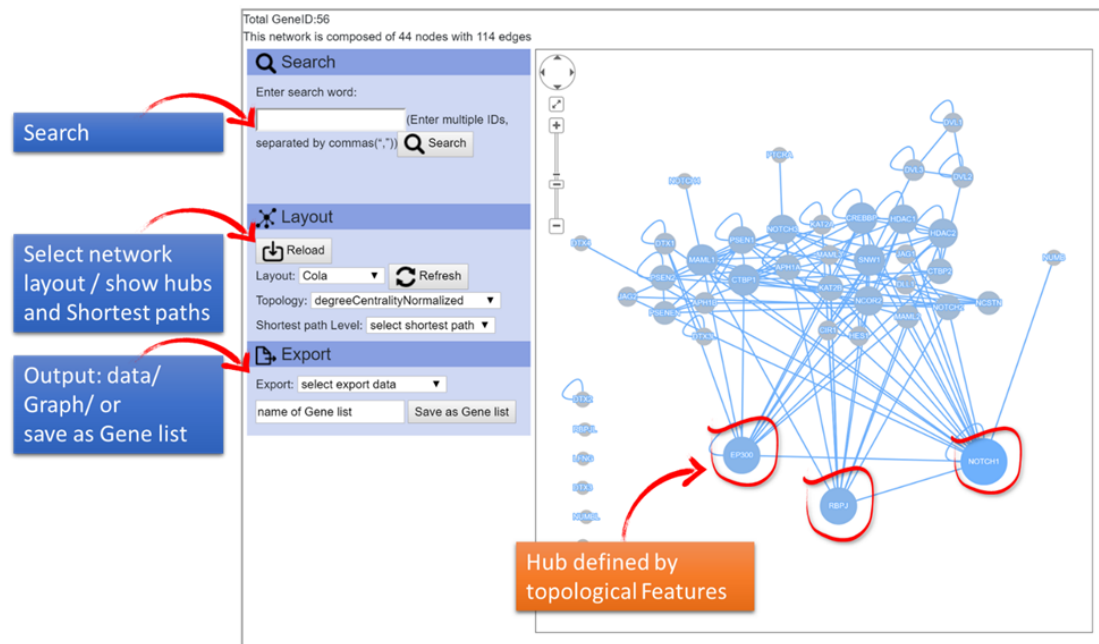

**Figure S23.** The protein interaction network viewer. Users can find and extract essential proteins via various layouts and methods.

### **Hierarchical Clustering Heatmap**

The heatmap function is used to display a measurement from each sample with unsupervised hierarchical clustering in both samples and the selected gene lists. We integrated the interactive clustered heatmap visualization generated by Clustergrammer [3] into EpiMOLAS\_web. The number of genes used to draw a heatmap is limited to 3000 because of the efficiency and rationality. The row annotations are the gene symbols with the dendrogram, while the column annotations are the samples with the dendrogram showing clusters between samples. We downloaded several human primordial germ cell WGBS datasets from this paper [4] for the following demonstration (Figure S24).



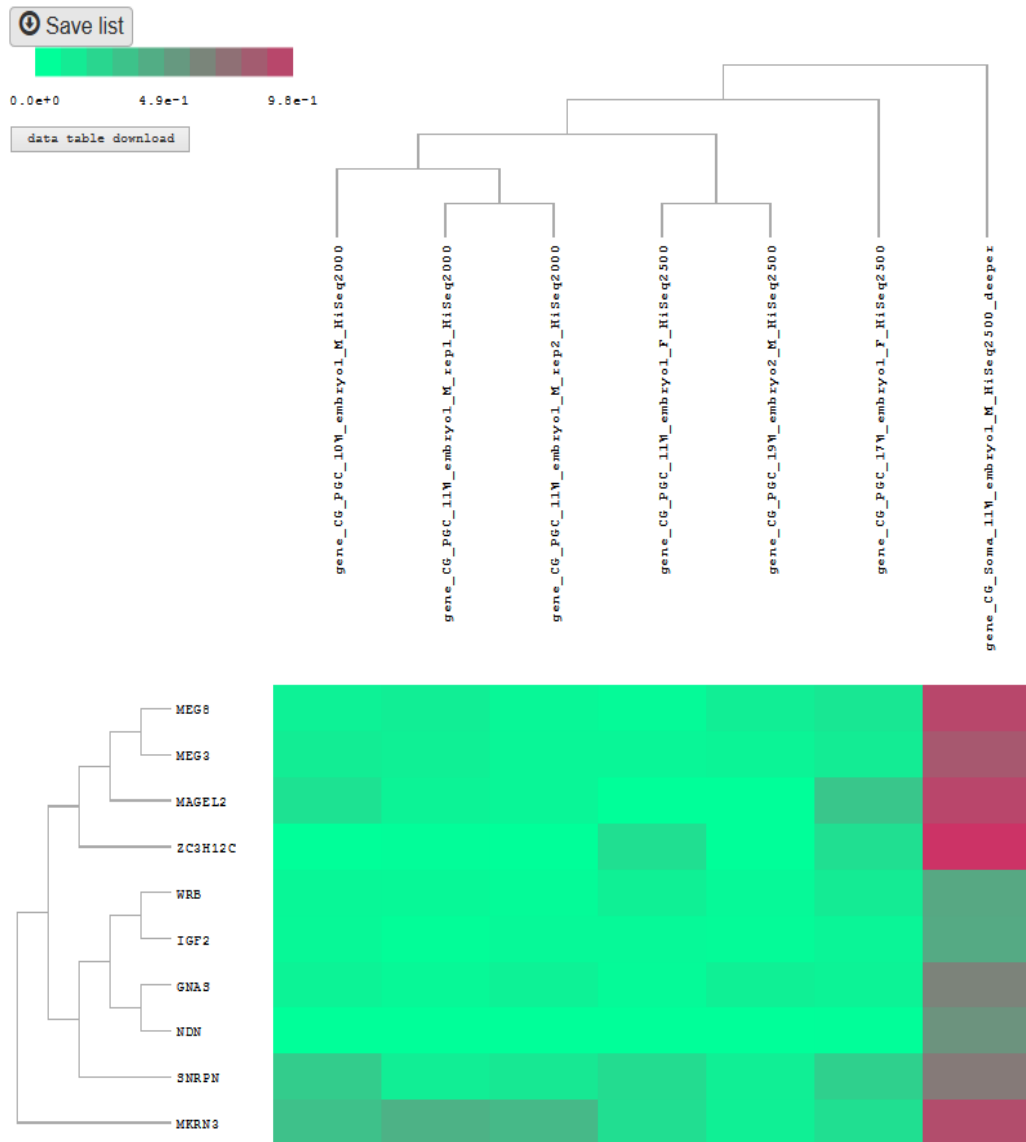

**Figure S24.** Hierarchical clustering heatmap. The row annotations are the gene symbols with the dendrogram, while the column annotations are the samples with the dendrogram showing clusters between samples. The green color represents hypomethylated genes and red color represents hypermethylated genes in the corresponding samples.

## Venn diagram and Circos plot

Venn diagram is a graphical way to manipulate gene lists as sets. It is an interactive and intuitive visual way to find subsets that are either overlapping or exclusive to the gene sets of interest. It can produce a diagram to compare up to four gene sets (Figure S25). The Circos plot visualization module [5] is used to label gene locations (the chromosomal coordination) of all genes in the selected list(s). This circular genome data visualization supports a variety of plot types. In Figure S26, chromosomes are shown in the outermost circle, and the innermost circle shows the genomic coordinates of selected genes. The middle circle with a color gradient represents the density of the coding genes. Each bin size for counting the coding genes is 1 MB base pairs.

**A**

HomeFull-text searchDMGs mC ThresholdImport GenelistKEGG GlobalViewGene List Analysis

Gene List

Search:

Show 5 entries

| View                                | Gene List Name                                 | Generate Value                                                                                                                                                                           | Note                                                                                 | Time                   | Operation                                                                                                                                                                                                             |
|-------------------------------------|------------------------------------------------|------------------------------------------------------------------------------------------------------------------------------------------------------------------------------------------|--------------------------------------------------------------------------------------|------------------------|-----------------------------------------------------------------------------------------------------------------------------------------------------------------------------------------------------------------------|
| <input type="checkbox"/>            | M_11w_PGC_vs_Soma (pmt_CG)                     | DMGs<br>poola.pgc_11w_embryo1_m_rep1_hiseq2000.pgc_11w_embryo1_m_rep2_hiseq2000<br>poolb.soma_11w_embryo1_m_hiseq2500_deeper.pmt_cg<br>select ALL, >= 0.5<br>Search:<br>totalgene:586    |                                                                                      | 2018-08-27<br>01:10:01 | <input type="button" value="delete"/> <input type="button" value="edit name"/> <input type="button" value="edit note"/><br><input type="button" value="downloadgenelist"/>                                            |
| <input type="checkbox"/>            | Intersection of Somatic DMRs and selected DMGs | Gene list analysis-venn<br>[DMG]11w_M_PGC_vs_Soma ^ Somatic DMRs<br>totalgene:10                                                                                                         |   | 2018-08-10<br>14:07:22 | <input type="button" value="delete"/> <input type="button" value="edit name"/> <input type="button" value="edit note"/><br><input type="button" value="downloadgenelist"/> <input type="button" value="downloadsvg"/> |
| <input type="checkbox"/>            | Somatic DMRs but not in DMGs                   | Gene list analysis-venn<br>Somatic DMRs not [DMG]11w_M_PGC_vs_Soma<br>totalgene:3                                                                                                        |  | 2018-08-09<br>17:24:08 | <input type="button" value="delete"/> <input type="button" value="edit name"/> <input type="button" value="edit note"/><br><input type="button" value="downloadgenelist"/> <input type="button" value="downloadsvg"/> |
| <input checked="" type="checkbox"/> | [DMG]11w_M_PGC_vs_Soma                         | DMGs<br>poola.pgc_11w_embryo1_m_rep1_hiseq2000.pgc_11w_embryo1_m_rep2_hiseq2000<br>poolb.soma_11w_embryo1_m_hiseq2500_deeper_gene_cg<br>select ALL, >= 0.3<br>Search:<br>totalgene:12558 |                                                                                      | 2018-08-09<br>17:00:20 | <input type="button" value="delete"/> <input type="button" value="edit name"/> <input type="button" value="edit note"/><br><input type="button" value="downloadgenelist"/>                                            |
| <input checked="" type="checkbox"/> | Somatic DMRs                                   | Import Genelist<br>Search:<br>totalgene:13                                                                                                                                               |                                                                                      | 2018-08-09<br>16:39:45 | <input type="button" value="delete"/> <input type="button" value="edit name"/> <input type="button" value="edit note"/><br><input type="button" value="downloadgenelist"/>                                            |

Showing 1 to 5 of 5 entries

2. Select Analytic Approach:  
☐ Show Gene List | pmt\_CG  
☐ Plot on the location of genes on chromosome map  
☒ Show Venn Diagram  
☐ Calculate GO term enrichment default p value cutoff 0.1  
☐ Calculate KEGG pathway enrichment  
☐ Draw heatmap with 2D clustering (Max. 3000 transcriptid) | pmt\_CG  
☐ Map on Protein Network (Max 600 transcripts)

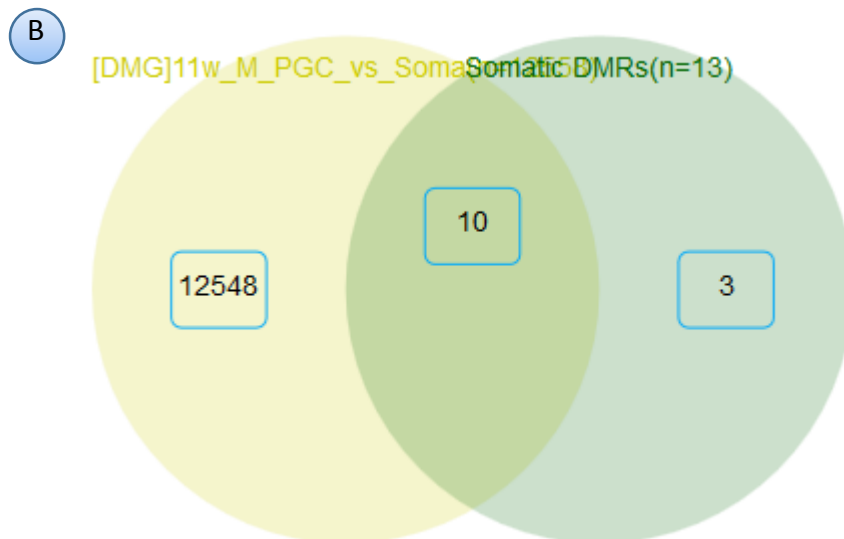

**Figure S25.** Venn diagram for two gene lists. (A) One is the differentially methylated genes (DMGs) that we select according to the criteria (Pool A: PGC\_11W\_embryo1\_M\_rep1\_HiSeq2000, PGC\_11W\_embryo1\_M\_rep2\_HiSeq2000 vs Pool B: Soma\_11W\_embryo1\_M\_HiSeq2500\_deeper, Diff  $\geq 0.3$ ), 12558 genes are selected in this selection criteria. The other is the somatic DMRs mentioned in the paper (Guo, et al., 2015). (B) The intersection of literature-based somatic DMRs and the DMGs comprises 10 genes. The three genes that are not included in the selection occurred because of the null value on the gene body region of CG context in the mtables. The Venn diagram provides an efficient visualization interface for users to compare the collected or generated gene lists.

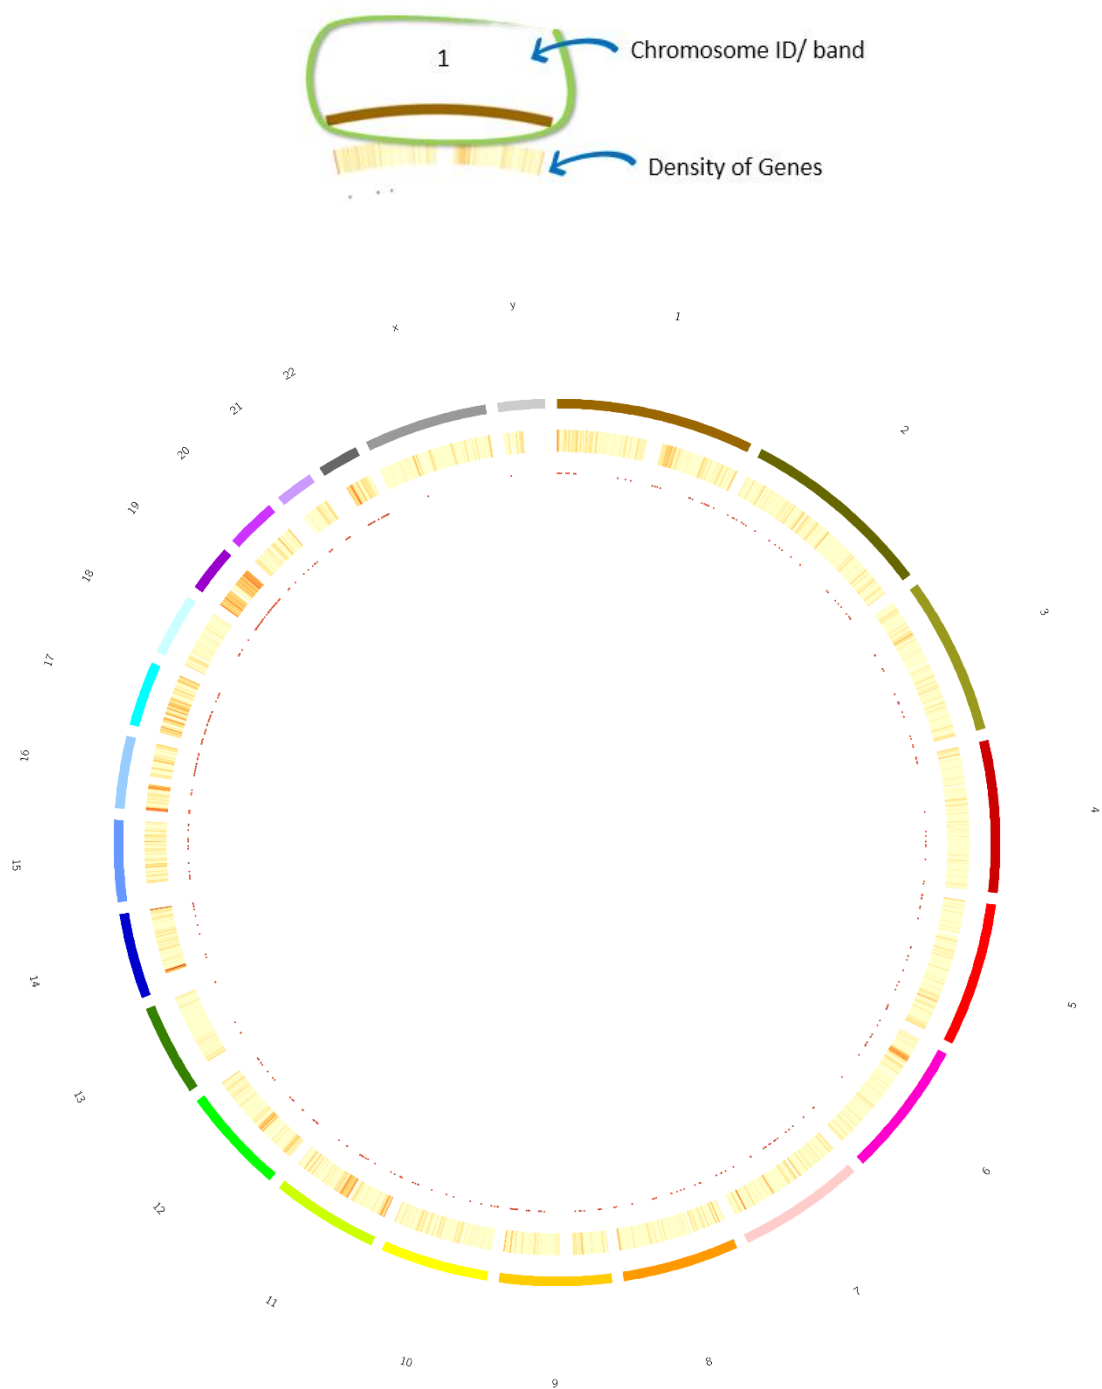

**Figure S26.** Circos plot of chromosomal location of a list of genes (gene list: M\_11w\_PGC\_vs\_Soma [pmt\_CG]. The number of genes: 586). Chromosomes are shown in the outermost circle. The innermost circle shows the genomic coordinates of selected genes. The middle circle represents the density of coding genes with bin size 1 MB.

### 3. Reference

1. Franz M, Lopes CT, Huck G, Dong Y, Sumer O, Bader GD: **Cytoscape.js: a graph theory library for visualisation and analysis**. *Bioinformatics* 2016, **32**:309-311.
2. Lin CY, Chin CH, Wu HH, Chen SH, Ho CW, Ko MT: **Hubba: hub objects analyzer-a framework of interactome hubs identification for network biology**. *Nucleic Acids Res* 2008, **36**:W438-443.
3. Fernandez NF, Gundersen GW, Rahman A, Grimes ML, Rikova K, Hornbeck P, Ma'ayan A: **Clustergrammer, a web-based heatmap visualization and analysis tool for high-dimensional biological data**. *Sci Data* 2017, **4**:170151.
4. Guo F, Yan L, Guo H, Li L, Hu B, Zhao Y, Yong J, Hu Y, Wang X, Wei Y, et al: **The Transcriptome and DNA Methylome Landscapes of Human Primordial Germ Cells**. *Cell* 2015, **161**:1437-1452.
5. Krzywinski M, Schein J, Birol I, Connors J, Gascoyne R, Horsman D, Jones SJ, Marra MA: **Circos: an information aesthetic for comparative genomics**. *Genome Res* 2009, **19**:1639-1645.
